# Supplementary material for: Evidence that avian reovirus σNS is an RNA chaperone: implications for genome segment assortment
Source: PubMed Central journal article supplement (PMC4538827; doi:10.1093/nar/gkv639), 2015-06-24
Supplement: supp_gkv639_nar-00350-h-2015-File008.pdf [file supp_gkv639_nar-00350-h-2015-File008.pdf]

## SUPPORTING DATA

Supporting Table S1. Oligonucleotide sequences used throughout the study.

| Name            | Sequence                                                                                                                                                |
|-----------------|---------------------------------------------------------------------------------------------------------------------------------------------------------|
| F_sns           | CATATGGACAACACCGTGCGTGTGGAG                                                                                                                             |
| R_sns           | CTCGAGGTCTACGCCATCCTAGCTGG                                                                                                                              |
| 120-nt template | <u>TAATACGACTCACTATAGGG</u> GAGACCTATTCTCTTTTTCTCTCTTTTCCCCCTGTTG<br>CTTTATTTTCCTTCTTTGCCTTTTTCTCTTTTTTTTTCTTTTTTCCCTTTCTGCTTTCC<br>TCCCCTATTCTCCCCTCTT |
| 30-nt RNA       | GACCUAUUCUCUUUUUCUCUCCUUUUC                                                                                                                             |
| 20-nt RNA       | GACCUAUUCUCUUUUUCUCU                                                                                                                                    |
| 46-nt           | AF488-ATAGGTATAACAGTTAACGTATGCTATACGCTAATAGCATACGTTT-TxRed                                                                                              |
| 33A             | UAUCGGAUAGUAGCACGUAUCAACUAUCCGAUA                                                                                                                       |
| 33B             | UAUCGGAUAGUUGAUACGUGCUACUAUCCGAUA                                                                                                                       |

T7 promoter sequence is underlined.

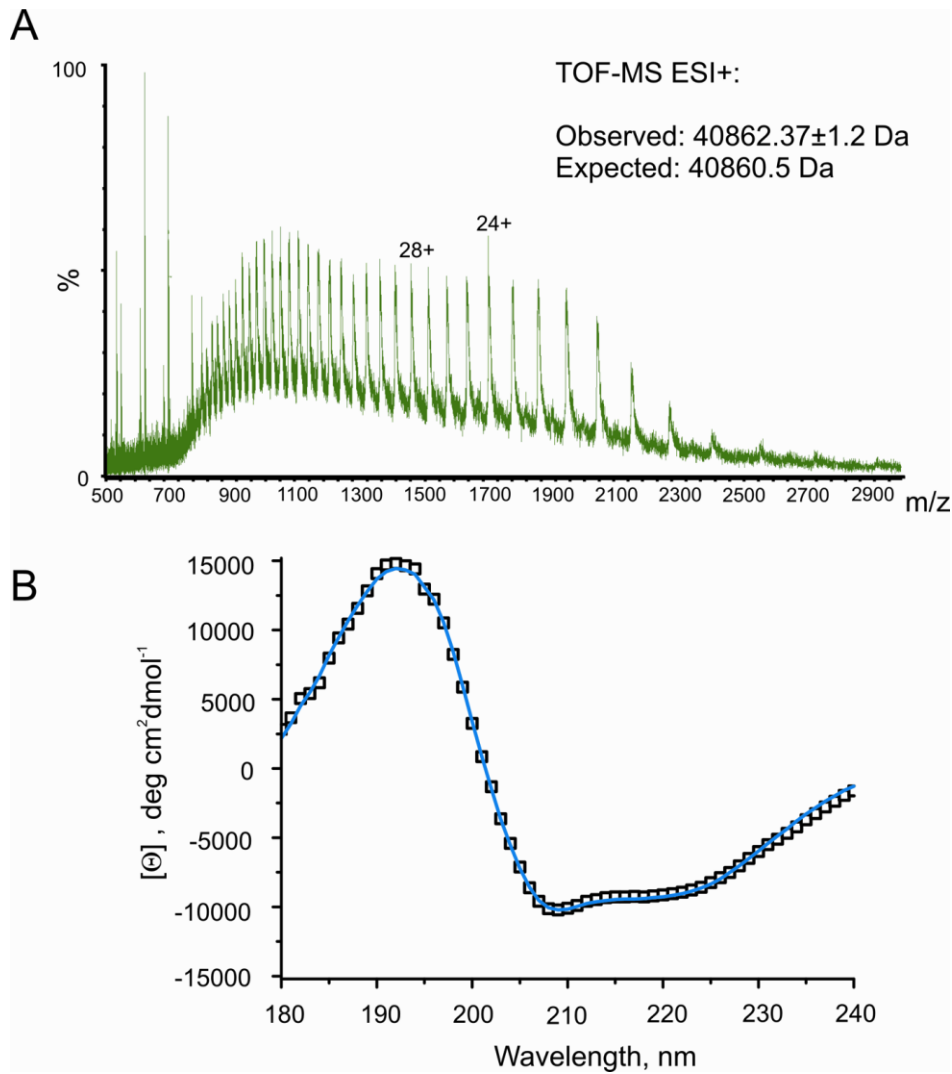

Figure S1. Characterization of the purified recombinant ARV  $\sigma$ NS.

(A) Denaturing ESI-MS of purified  $\sigma$ NS, the observed mass is  $40862.4 \pm 1.2$  Da, consistent with the expected mass of a protonated molecular ion (40861.5 Da).

(B) Circular dichroism spectrum of the ARV  $\sigma$ NS (10  $\mu$ M). Averaged spectral data from 3 scans (black squares) are shown with the best fit (blue line), corresponding to 29%  $\alpha$ -helix, 35%  $\beta$ -sheet and 35% coils (see Methods for details).

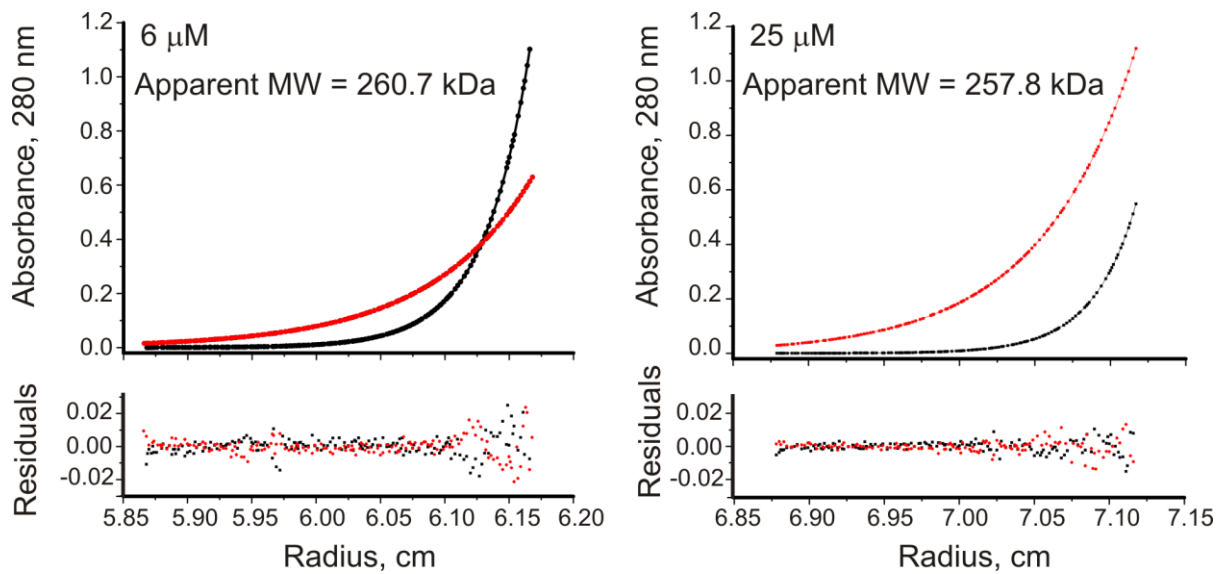

Figure S2.  $\sigma$ NS in sedimentation equilibrium. Absorbance profiles at 280 nm at a loading concentration of (A) 6  $\mu$ M (B) 25  $\mu$ M at 8,000 rpm (red) and 12,000 rpm (black). Solid lines are the best-fit single species model with a molar mass of  $259.3 \pm 12$  kDa, with the residuals shown below.

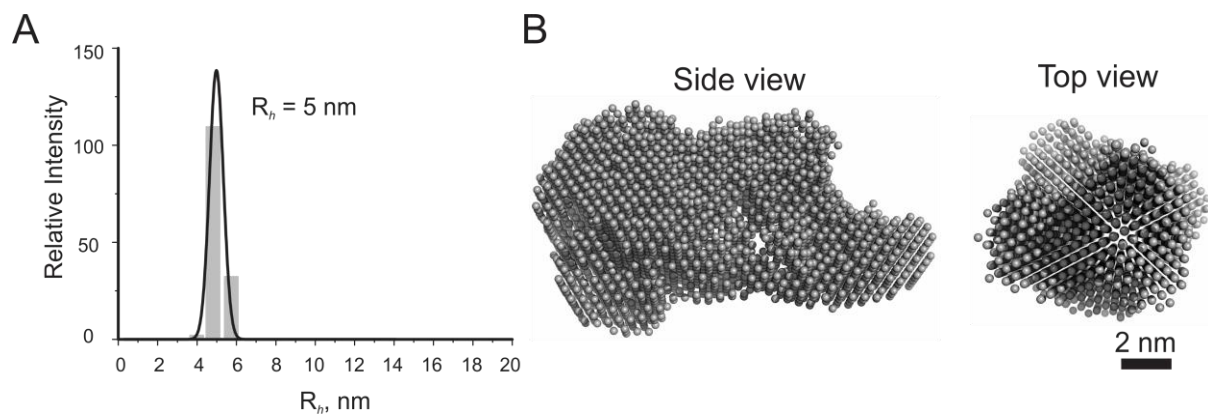

Figure S3. A. Averaged distribution of apparent hydrodynamic radii ( $R_h$ ) of the ARV  $\sigma$ NS protein oligomers (10-25  $\mu$ M), measured by dynamic light scattering, as described in Materials and Methods.

B. P1 (no symmetry imposed) bead model of the ARV  $\sigma$ NS hexamer based on SAXS data.

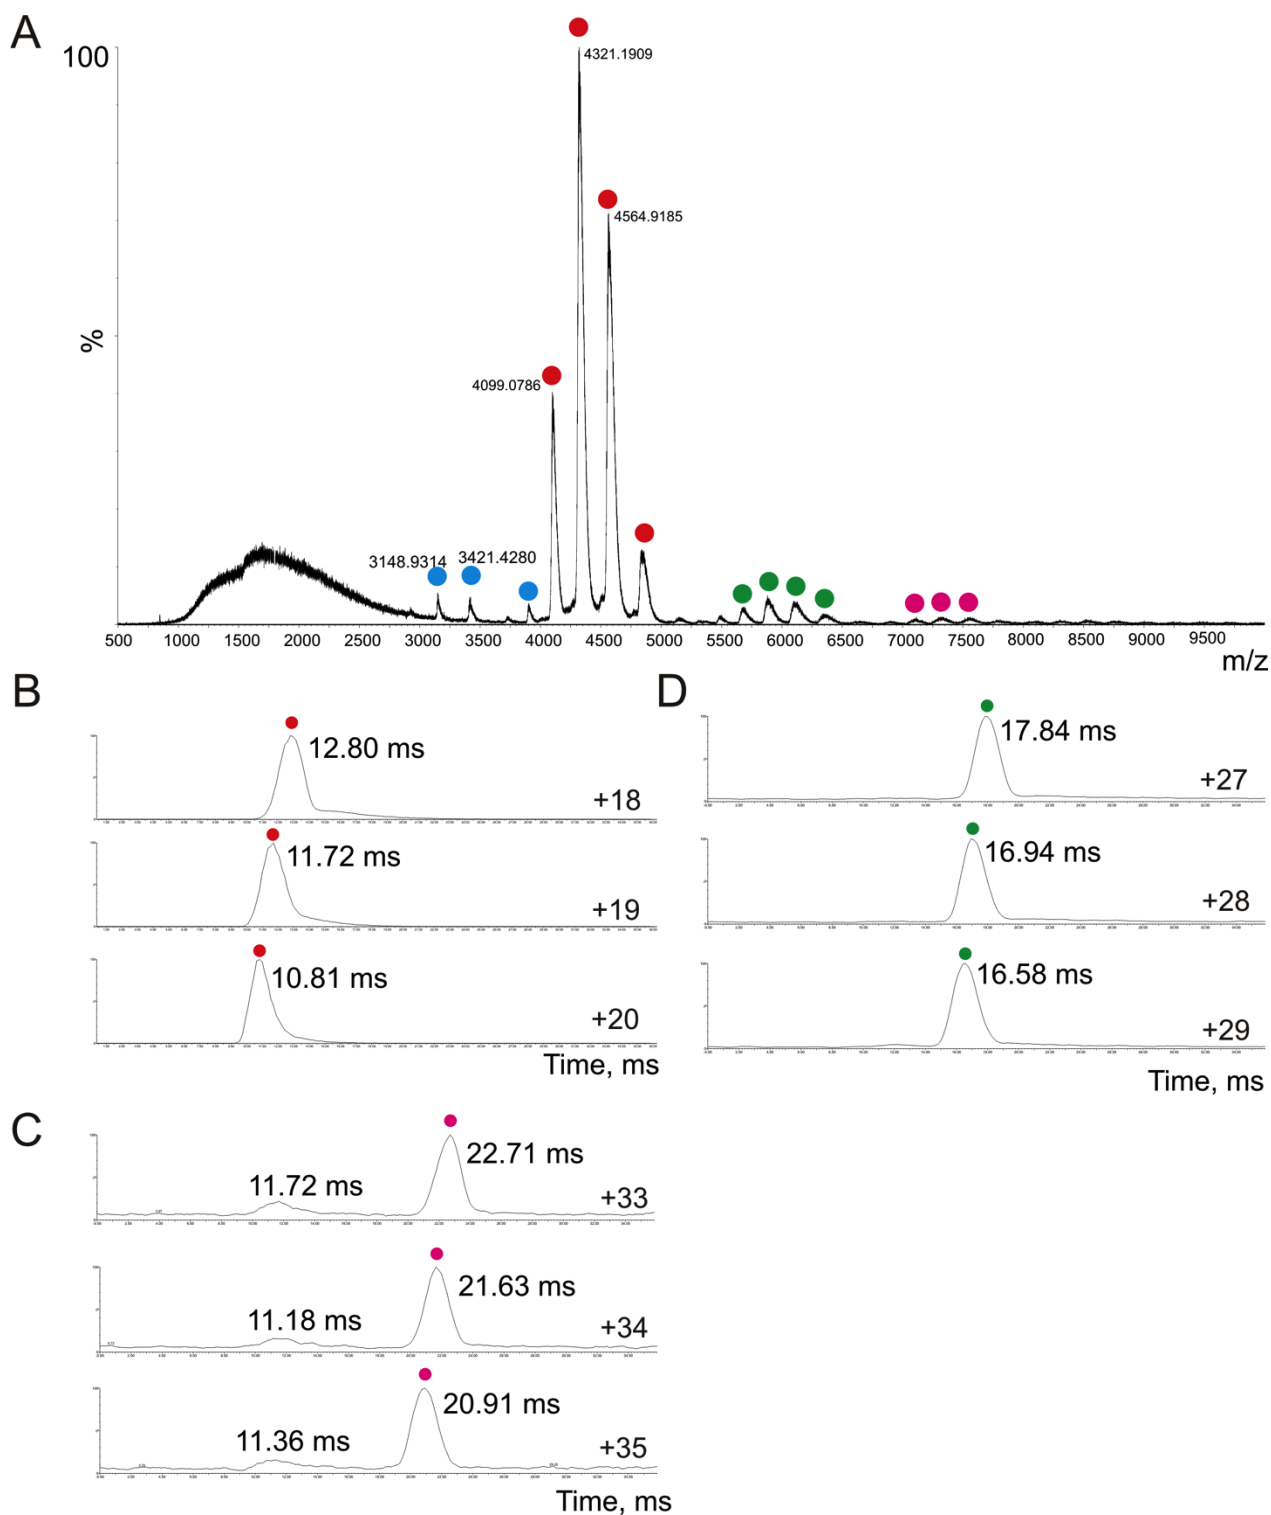

Figure S4. (A) Native electrospray ionisation mass spectrum (ESI-MS) of 25  $\mu$ M  $\sigma$ NS. Peaks corresponding to  $\sigma$ NS monomers are labelled by blue dots, dimers are labelled in red, tetramers are shown in green, and hexamers are shown in magenta.

(B) – (D) Ion-mobility (ESI-IMS-MS) arrival time plots of  $\sigma$ NS oligomers. Different arrival times (in ms) are shown for the 3 lowest charge states (18+ to 20+) for  $\sigma$ NS dimers (B), 27+ to 29+ for tetramers (C) and 33+ to 35+ for hexamers (D). Summary of detected oligomeric species, measured by ESI-IMS-MS is shown in Supporting Table S2.

Supporting Table S2. Masses, cross-sectional areas,  $m/z$  ratios and drift time values of various  $\sigma$ NS oligomers estimated by ESI-IMS-MS

| [ $\sigma$ NS],<br>$\mu$ M | $\sigma$ NS | Mass,<br>Da | charge | $m/z$   | Corrected<br>drift time,<br>ms | Cross-<br>section,<br>$\text{\AA}^2$ | Average<br>cross-<br>section,<br>$\text{\AA}^2$ |
|----------------------------|-------------|-------------|--------|---------|--------------------------------|--------------------------------------|-------------------------------------------------|
| 12.5                       | dimer       | 81826       | 18     | 4546.89 | 11.80                          | 5129.26                              | 5283.32                                         |
|                            |             | 81826       | 19     | 4307.63 | 10.72                          | 5283.42                              |                                                 |
|                            |             | 81826       | 20     | 4092.30 | 9.81                           | 5437.28                              |                                                 |
|                            | tetramer    | 163474      | 27     | 6055.59 | 16.82                          | 8422.87                              | 8643.41                                         |
|                            |             | 163474      | 28     | 5839.36 | 16.11                          | 8638.08                              |                                                 |
|                            |             | 163474      | 29     | 5638.03 | 15.57                          | 8869.28                              |                                                 |
|                            | hexamer     | 246546      | 33     | 7472.09 | 21.68                          | 10983.31                             | 11191.23                                        |
|                            |             | 246546      | 34     | 7252.35 | 20.60                          | 11169.67                             |                                                 |
|                            |             | 246546      | 35     | 7045.17 | 20.06                          | 11420.72                             |                                                 |
| 25                         | hexamer     | 246546      | 33     | 7472.09 | 20.42                          | 10816.62                             | 11022.27                                        |
|                            |             | 246546      | 34     | 7252.35 | 19.52                          | 11017.11                             |                                                 |
|                            |             | 246546      | 35     | 7045.17 | 18.80                          | 11233.09                             |                                                 |
| 55                         | hexamer     | 246546      | 33     | 7472.09 | 20.42                          | 10816.62                             | 11022.27                                        |
|                            |             | 246546      | 34     | 7252.35 | 19.52                          | 11017.11                             |                                                 |
|                            |             | 246546      | 35     | 7045.17 | 18.80                          | 11233.09                             |                                                 |
| 110                        | hexamer     | 246546      | 33     | 7472.09 | 20.60                          | 10840.89                             | 11038.98                                        |
|                            |             | 246546      | 34     | 7252.35 | 19.70                          | 11042.97                             |                                                 |
|                            |             | 246546      | 35     | 7045.17 | 18.80                          | 11233.09                             |                                                 |

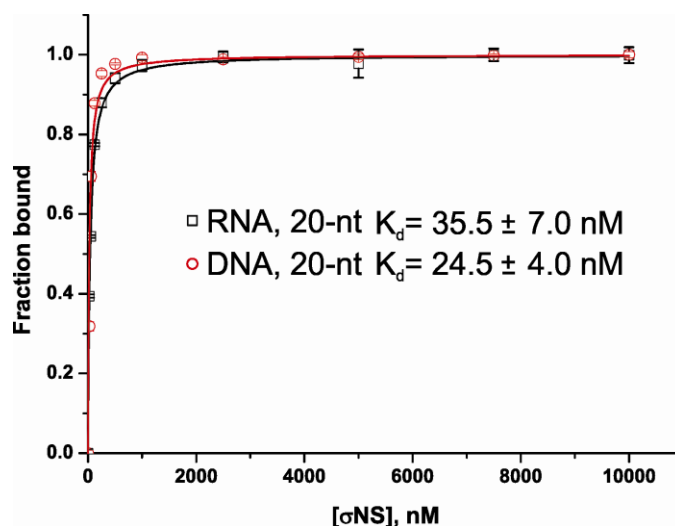

Figure S5. The apparent affinities of  $\sigma$ NS for unstructured 20-nt ssRNAs (black), and a similar 20-nt ssDNA, measured by fluorescence anisotropy (FA). Normalized FA intensities were fitted to a one-site binding model for both substrates (solid lines), yielding  $K_d$  values of  $35 \pm 7.0$  and  $24.5 \pm 4.0$  nM for the RNA and DNA, respectively. Note, the apparent  $K_d$  of  $26.5 \pm 4.2$  nM, shown in Figure 2 A, was estimated independently in a separate measurement with different batches of the protein and RNA.

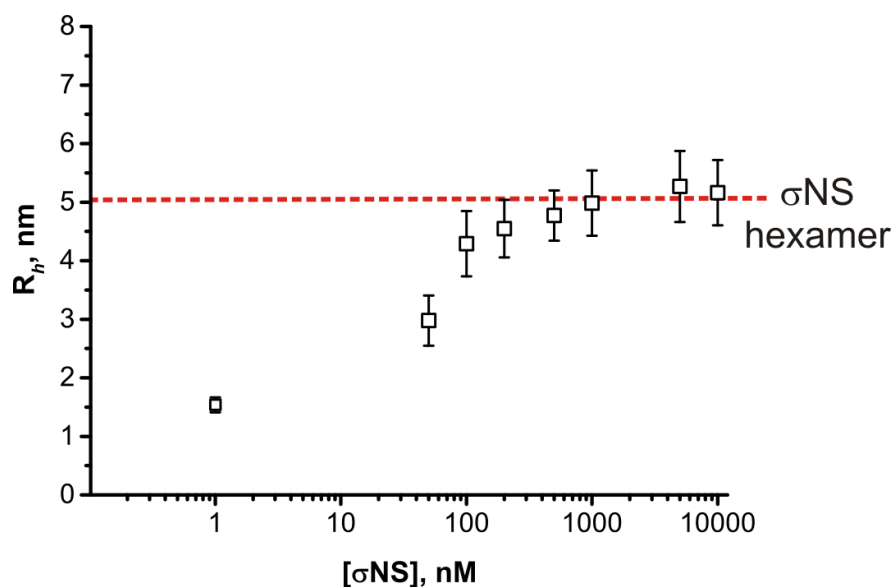

Figure S6. 20-nt long RNA binding to  $\sigma$ NS, followed by FCS. Fluorescently labelled RNA (1 nM) was incubated with various amounts of  $\sigma$ NS (0-10  $\mu$ M). Fitting data to a one site binding model yields a  $K_d$  of  $39.5 \pm 8$  nM, consistent with the dissociation constant independently estimated by fluorescence anisotropy for the 20-nt long RNA ( $K_d \sim 25$  nM). Upon saturation at 1  $\mu$ M  $\sigma$ NS, the apparent  $R_h$  does not increase beyond that expected for the  $\sigma$ NS hexamer (red dashed line).

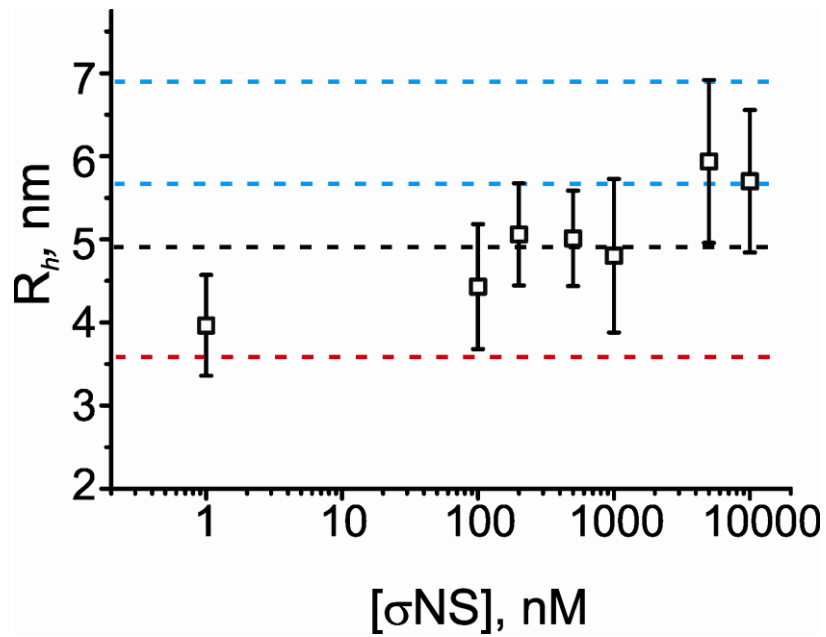

Figure S7. Apparent hydrodynamic radii ( $R_h$ ) of a fluorescently labelled 120-nt RNA, measured by fluorescence correlation spectroscopy (FCS). Protein-free RNA (1 nM, red) with apparent  $R_h$  of  $\sim 3.6$  nm, increases its size upon addition of up to  $10 \mu\text{M}$   $\sigma$ NS. Size of the  $\sigma$ NS hexamer is shown as black dashed line, while the blue dashed lines represent the estimated hydrodynamic radii of the 13S and 18S species, identified in the SV analysis of the corresponding RNA, incubated with  $6 \mu\text{M}$   $\sigma$ NS (see Figure 2 B, main text).

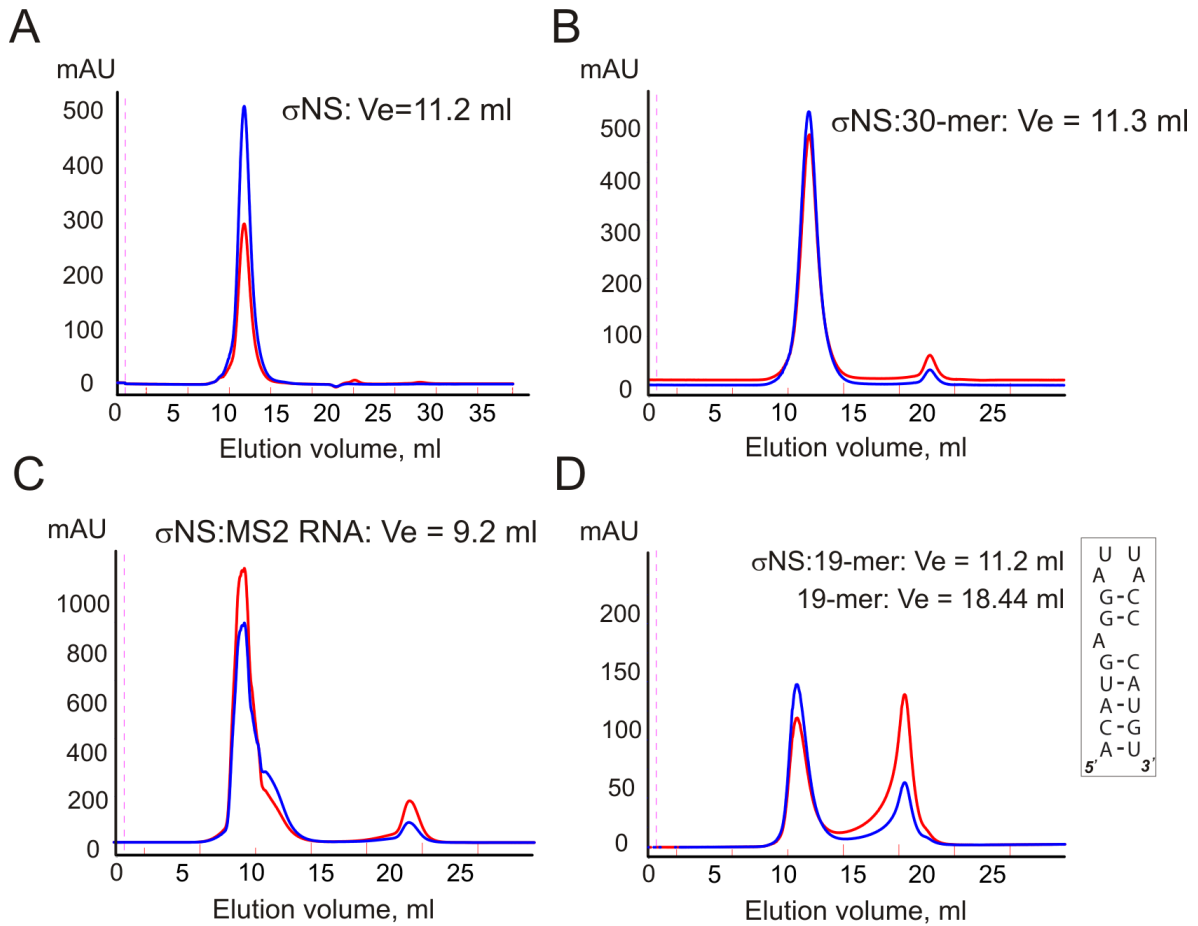

Figure S8. Size exclusion chromatogram (SEC) profiles of  $\sigma$ NS and  $\sigma$ NS-RNA complexes. SEC elution profiles from Superdex 200 300/GL column (equilibrated with 25 mM HEPES-Na, pH 7.8, 150 mM NaCl, at +4°C). Absorbance at 280 and 260 nm is shown in blue and red, respectively, with the injection point indicated by a dashed magenta line.  $V_e$  – elution volume (in ml). (A) 1 mg of  $\sigma$ NS; (B)  $\sigma$ NS:30-mer RNA complex. Note the increased 260/280 nm absorbance ratio compared to the RNA-free  $\sigma$ NS shown in (A). RNA-free  $\sigma$ NS and  $\sigma$ NS-30-mer RNA complex have similar  $V_e$ , suggesting that although  $\sigma$ NS hexamers bind short RNAs, they do not form large aggregates. (C)  $\sigma$ NS:MS2 RNA complex. Long RNAs (3.6 kb MS2 phage RNA) bind multiple copies of  $\sigma$ NS, forming large aggregates. (D) SEC of the 19-nt long RNA stem-loop (4-nt long loop, shown on the right), incubated with  $\sigma$ NS (2  $\mu$ M RNA:40  $\mu$ M  $\sigma$ NS). Almost no apparent RNA binding was observed, judged by only slightly altered (280/260 nm) ratios of the 11.2 ml peak, corresponding to the  $\sigma$ NS hexamer alone ( $V_e=11.2$  ml). As expected, a short RNA stem-loop was eluting separately ( $V_e = 18.44$  ml), further indicating absence of  $\sigma$ NS binding.



Supporting Table S3. Molecular masses of  $\sigma$ NS:RNA ribonucleoproteins, detected by ESI-MS.

| Detected              | Observed mass, Da     | Expected mass, Da | $\sigma$ NS:RNA stoichiometry |
|-----------------------|-----------------------|-------------------|-------------------------------|
| 20-nt RNA             | 6140.99 $\pm$ 0.26*   | 6141              | N/A                           |
| $\sigma$ NS monomer   | 40859.85 $\pm$ 0.12*  | 40860.5           | N/A                           |
| $\sigma$ NS dimer     | 81738.23 $\pm$ 0.75   | 81722             | N/A                           |
| $\sigma$ NS tetramer  | 163606.75 $\pm$ 12.28 | 163444            | N/A                           |
| $\sigma$ NS hexamer   | 251422 $\pm$ 25.5     | 252301            | Hexamer : 1 RNA               |
| $\sigma$ NS hexamer   | 257437.33 $\pm$ 30.2  | 257442            | Hexamer : 2 RNAs              |
| $\sigma$ NS octamer # | 339542.75 $\pm$ 24.0  | 339162            | Octamer : 2 RNAs              |

\*Masses estimated by denaturing ESI-MS

#At higher micromolar  $\sigma$ NS concentrations (25-150  $\mu$ M) the octameric species with two RNAs bound were also observed, however, given that no octamers were seen in sedimentation analyses, it is possible that these species represent an artefact of the electrospray ionisation process at high protein concentration.

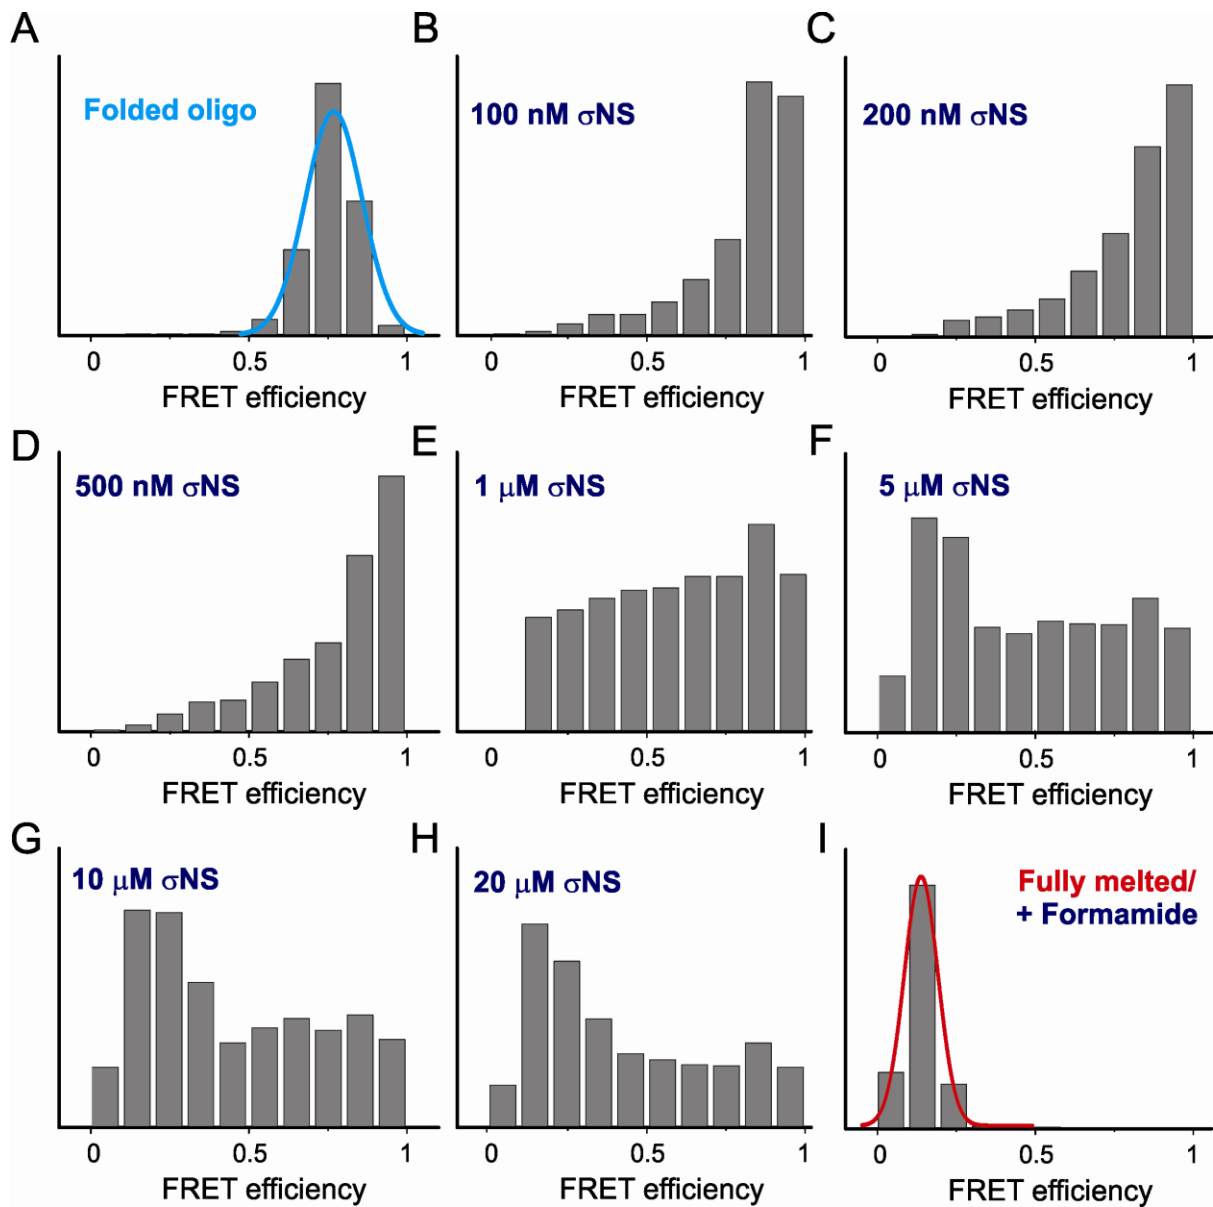

Figure S9. Population histograms obtained from ALEX smFRET measurements of the dual-labelled 46-nt stem-loop. (A) 10 pM of fluorescently dual-labelled stem-loop was measured to produce a histogram, with the overlaid Gaussian fit shown in cyan. Panels (B-H) show the histograms of the probe as in (A), incubated with increasing concentrations of the ARV  $\sigma$ NS (100 nM – 20  $\mu$ M). Note there is an apparent shift of FRET population towards higher FRET efficiency (panels B-D), caused by changes in local environment of fluorescent reporters due to initial protein binding. Panel (I) shows the data for formamide-melted probe.

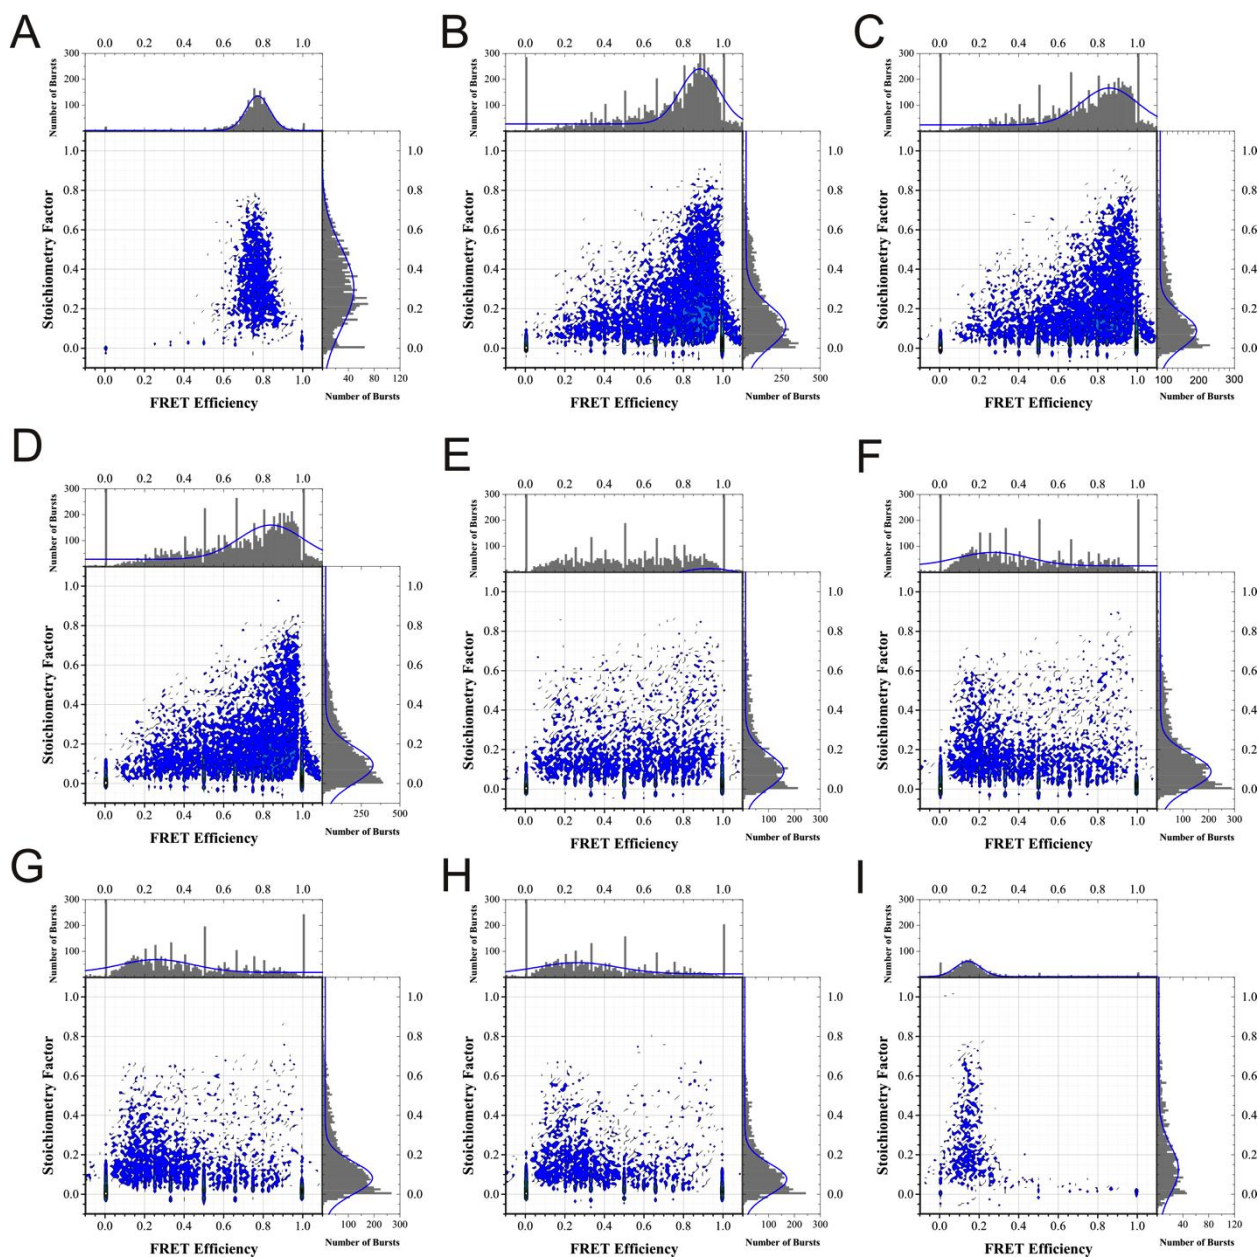

Figure S10. Two-dimensional histograms of fluorescent photon bursts, showing the ratiometric observable E (FRET efficiency) and S (stoichiometric factor), produced from Alternating Laser Excitation (ALEX) single-molecule FRET measurements of the dual-labelled 46-nt stem-loop. 10 pM of fluorescently dual-labelled folded stem-loop was measured alone (A), and with increasing concentrations of the ARV  $\sigma$ NS (B-H), as well as in the presence of formamide (I), as described in Materials and Methods. These histograms were used to produce smFRET population histograms of the 46-nt stem-loop probe, as shown in Figures S9 and panels C and D in Figure 3.
